# Supplementary material
Source: PubMed Central journal article supplement (PMC9472578)
Supplement: mmc1.pdf [file mmc1.pdf]

# THE LANCET

## Global Health

### Supplementary appendix 1

This translation in Portuguese was submitted by the authors and we reproduce it as supplied. It has not been peer reviewed. *The Lancet's* editorial processes have only been applied to the original in English, which should serve as reference for this manuscript.

Esta tradução em português foi submetida pelos autores e nós não fizemos quaisquer alterações. Esta versão não foi revista por pares. O processo editorial do The Lancet só foi aplicado à versão original em inglês, que deve servir como referência para este artigo.

Supplement to: Li Y, de Macedo Couto R, Pelissari DM, et al. Excess tuberculosis cases and deaths following an economic recession in Brazil: an analysis of nationally representative disease registry data. *Lancet Glob Health* 2022; published online Aug 29. [https://doi.org/10.1016/S2214-109X\(22\)00320-5](https://doi.org/10.1016/S2214-109X(22)00320-5).

## Resumo

**Introdução** Em 2019, no Brasil, a incidência de tuberculose (TB) e a mortalidade foram de 46,0 casos e 3,3 óbitos por 100.000 habitantes, respectivamente. O país tem registrado aumento das taxas de incidência de TB desde 2016, seguindo os efeitos da crise econômica iniciada em meados de 2014. Foi estimado o excesso de casos de TB e mortes durante o período de recessão, assim como foram avaliadas suas potenciais causas.

**Métodos** Por meio de um modelo de regressão multinível, foram avaliadas as notificações por TB no Sistema de Informação de Agravos de Notificação (SINAN) e dos óbitos por TB no Sistema de Informação sobre Mortalidade (SIM), para todas as idades. Foram utilizados modelos de regressão de efeitos mistos, estimando tendências – estratificados por sexo, faixa etária e unidade da federação – durante o período de pré-recessão (01 de janeiro de 2010 a 31 de dezembro de 2014). Foram calculados os excessos de casos e óbitos entre 01 de janeiro de 2015 a 31 de dezembro de 2019 (período de recessão) pela diferença entre os casos registrados no sistema de informação e os casos estimados pelas tendências pré-recessão. A relação entre o excesso de casos e possíveis fatores explicativos foi avaliada por meio da regressão pelo método dos mínimos quadrados. A robustez dos achados foi testada, utilizando alternativas de definição do período de pré-recessão e dos critérios de óbito por TB.

**Resultados** Estimaram-se 22.900 casos de TB em excesso (intervalo de confiança de 95%: 18.100 - 27.500) durante 2015-2019. Em 2019, os casos notificados foram 12% (10% - 13%) maiores do que o estimado pela tendência da série histórica. A maioria dos casos em excesso (54% (44% - 66%)) ocorreu entre homens de 20 a 29 anos. Nesse grupo, os casos notificados em 2019 foram 30% (25% - 36%) maiores do que o estimado. O excesso de casos, ao nível das unidades federadas, teve associação estatística significativa com uma fração crescente de casos na população privada de liberdade ( $p=0,001$ ) e altas taxas de desemprego ( $p=0,04$ ). A estimativa de excesso de óbitos para 2015-2019 não foi estatisticamente significativa (-600 (-2.100 – 1.000)). Os resultados foram robustos para definições alternativas do início do período de pré-recessão e critérios de óbito por TB.

**Conclusão** Os casos de TB no Brasil aumentaram substancialmente durante a recessão entre 2015 e 2019, afetando principalmente homens jovens. Esse aumento parece estar associado com o aumento da transmissão da tuberculose entre a população privada de liberdade. O aumento das taxas de incidência ameaça o controle da TB no Brasil e realça o desafio da transmissão da TB nas prisões.

**Financiamento** Instituto Nacional de Saúde do Estado Unidos

**Direitos autorais** © 2022 O(s) Autor(es). Publicado pela Elsevier Ltd. Este é um artigo de Acesso Aberto sob a licença CC BY-NC-ND 4.0.
