# Supplementary material
Source: PubMed Central journal article supplement (PMC9472578)
Supplement: mmc2.pdf [file mmc2.pdf]

# THE LANCET

## Global Health

### Supplementary appendix 2

This appendix formed part of the original submission and has been peer reviewed. We post it as supplied by the authors.

Supplement to: Li Y, de Macedo Couto R, Pelissari DM, et al. Excess tuberculosis cases and deaths following an economic recession in Brazil: an analysis of nationally representative disease registry data. *Lancet Glob Health* 2022; published online Aug 29. [https://doi.org/10.1016/S2214-109X\(22\)00320-5](https://doi.org/10.1016/S2214-109X(22)00320-5).

# Excess tuberculosis cases and deaths following an economic recession in Brazil: an analysis of nationally-representative disease registry data appendix 2

## Table of Contents

|                                                                                                                                                                                                                                                                                                           |    |
|-----------------------------------------------------------------------------------------------------------------------------------------------------------------------------------------------------------------------------------------------------------------------------------------------------------|----|
| <b>TABLES</b> .....                                                                                                                                                                                                                                                                                       | 1  |
| <i>Table S1. Number and proportion of TB excess cases by sex and age group in Brazil over the recession period 2015-2019.</i> .....                                                                                                                                                                       | 1  |
| <i>Table S2. Number and proportion of TB excess cases by in Brazil over the recession period 2015-2019.</i> .....                                                                                                                                                                                         | 2  |
| <i>Table S3. Linear models of association of ratio of recorded to predicted cases with extreme poverty rate.</i> .....                                                                                                                                                                                    | 3  |
| <b>FIGURES</b> .....                                                                                                                                                                                                                                                                                      | 4  |
| <i>Figure S1a. Pre-recession trends of rates of TB case notifications, absolute and excess cases in men by age group in Brazil over 2010 to 2019.</i> .....                                                                                                                                               | 4  |
| <i>Figure S1b. Pre-recession trends of rates of TB case notifications, absolute and excess cases in women by age group in Brazil over 2010 to 2019.</i> .....                                                                                                                                             | 5  |
| <i>Figure S2. Pre-recession trends of rates of TB case notifications, absolute and excess cases by state in Brazil over 2010 to 2019.</i> .....                                                                                                                                                           | 6  |
| <i>Figure S2 (Continued). Pre-recession trends of rates of TB case notifications, absolute and excess cases by state in Brazil over 2010 to 2019.</i> .....                                                                                                                                               | 7  |
| <i>Figure S3a. Pre-recession trends of rates of TB deaths, absolute and excess deaths in men by age group in Brazil over 2010 to 2019.</i> .....                                                                                                                                                          | 8  |
| <i>Figure S3b. Pre-recession trends of rates of TB deaths, absolute and excess deaths in women by age group in Brazil over 2010 to 2019.</i> .....                                                                                                                                                        | 9  |
| <i>Figure S4. Pre-recession trends of rates of TB deaths, absolute and excess deaths by state in Brazil over 2010 to 2019.</i> .....                                                                                                                                                                      | 10 |
| <i>Figure S4 (Continued). Pre-recession trends of rates of TB deaths, absolute and excess deaths by state in Brazil over 2010 to 2019.</i> .....                                                                                                                                                          | 11 |
| <i>Figure S5a. Sensitivity analysis (1) results: Estimates of total excess cases and total excess deaths among total population and men ages 20–29 years during recession over 2015–2019, with different lengths of pre-recession periods (from 3 years of 2012–2014 to 14 years of 2001–2014).</i> ..... | 12 |
| <i>Figure S5b. Sensitivity analysis (2) results: Estimates of total excess deaths with alternative criteria for defining TB deaths among total population over 2010 to 2019.</i> .....                                                                                                                    | 13 |

## TABLES

Table S1. Number and proportion of TB excess cases by sex and age group in Brazil over the recession period 2015-2019.

| <b>Sex/Age group</b> | <b>Excess cases<br/>(Mean)</b> | <b>Excess cases<br/>(95% UI)</b> | <b>Proportion of<br/>excess cases<br/>(%, Mean)</b> | <b>Proportion of<br/>excess cases<br/>(%, 95% UI)</b> |
|----------------------|--------------------------------|----------------------------------|-----------------------------------------------------|-------------------------------------------------------|
| <b>Men</b>           |                                |                                  |                                                     |                                                       |
| Age 0-9              | 208                            | (-201, 590)                      | 0.9                                                 | (-0.9,2.6)                                            |
| Age 10-19            | -33                            | (-938, 799)                      | -0.2                                                | (-4.4, 3.4)                                           |
| Age 20-29            | 12284                          | (10350, 14163)                   | 54.1                                                | (44.1, 66.2)                                          |
| Age 30-39            | 3763                           | (1908, 5487)                     | 16.5                                                | (8.9, 23.6)                                           |
| Age 40-49            | 287                            | (-1314, 1871)                    | 1.1                                                 | (-6.3, 7.7)                                           |
| Age 50-59            | 214                            | (-1297, 1666)                    | 0.8                                                 | (-6.2, 7.0)                                           |
| Age 60-69            | 1260                           | (105, 2346)                      | 5.5                                                 | (0.5, 10.1)                                           |
| Age 70-79            | 639                            | (-73, 1303)                      | 2.8                                                 | (-0.3, 5.8)                                           |
| Age 80+              | 313                            | (-101, 704)                      | 1.4                                                 | (-0.4, 3.1)                                           |
| <b>Women</b>         |                                |                                  |                                                     |                                                       |
| Age 0-9              | 33                             | (-298, 344)                      | 0.1                                                 | (-1.4, 1.5)                                           |
| Age 10-19            | 147                            | (-570, 856)                      | 0.6                                                 | (-2.7, 3.7)                                           |
| Age 20-29            | 837                            | (-248, 1879)                     | 3.6                                                 | (-1.1, 8.2)                                           |
| Age 30-39            | 253                            | (-811, 1295)                     | 1.0                                                 | (-3.9, 5.5)                                           |
| Age 40-49            | -1                             | (-942, 910)                      | -0.1                                                | (-4.5, 3.9)                                           |
| Age 50-59            | 701                            | (-129, 1518)                     | 3.1                                                 | (-0.6, 6.6)                                           |
| Age 60-69            | 1114                           | (473, 1741)                      | 4.9                                                 | (2.1, 7.7)                                            |
| Age 70-79            | 498                            | (49, 917)                        | 2.2                                                 | (0.2, 4.1)                                            |
| Age 80+              | 353                            | (56, 631)                        | 1.6                                                 | (0.3, 2.8)                                            |
| <b>Total</b>         | <b>22869</b>                   | <b>(18126, 27528)</b>            | <b>100</b>                                          | <b>NA</b>                                             |

Table S2. Number and proportion of TB excess cases by in Brazil over the recession period 2015-2019.

| State                    | Excess cases<br>(Mean) | Excess cases<br>(95% UI) | Proportion of<br>recorded to<br>predicted cases<br>(%, Mean) | Proportion of<br>recorded to<br>predicted cases<br>(%, 95% UI) |
|--------------------------|------------------------|--------------------------|--------------------------------------------------------------|----------------------------------------------------------------|
| <b>North</b>             |                        |                          |                                                              |                                                                |
| Acre (AC)                | -13                    | (-408, 358)              | 99.5                                                         | (85.4, 117.6)                                                  |
| Amazonas (AM)            | 303                    | (-847, 1399)             | 101.7                                                        | (95.6, 108.2)                                                  |
| Amapá (AP)               | 452                    | (236, 638)               | 146.0                                                        | (119.7, 180.3)                                                 |
| Pará (PA)                | 3730                   | (2677, 4735)             | 119.0                                                        | (113.0, 125.4)                                                 |
| Rondônia (RO)            | -310                   | (-820, 163)              | 92.3                                                         | (81.8, 104.6)                                                  |
| Roraima (RR)             | 348                    | (121, 529)               | 143.9                                                        | (111.8, 186.3)                                                 |
| Tocantins (TO)           | 194                    | (-35, 382)               | 121.0                                                        | (97.0, 151.9)                                                  |
| <b>Northeast</b>         |                        |                          |                                                              |                                                                |
| Alagoas (AL)             | 47                     | (-560, 593)              | 100.8                                                        | (91.9, 110.3)                                                  |
| Bahia (BA)               | 2390                   | (1329, 3434)             | 109.3                                                        | (104.9, 113.9)                                                 |
| Ceará (CE)               | 3532                   | (2640, 4415)             | 119.0                                                        | (113.6, 125.0)                                                 |
| Maranhão (MA)            | 3151                   | (2506, 3773)             | 132.0                                                        | (123.9, 140.9)                                                 |
| Paraíba (PB)             | -230                   | (-867, 381)              | 96.8                                                         | (88.8, 105.8)                                                  |
| Pernambuco (PE)          | 778                    | (-557, 2030)             | 102.7                                                        | (98.2, 107.2)                                                  |
| Piauí (PI)               | 513                    | (124, 873)               | 114.3                                                        | (103.1, 127.1)                                                 |
| Rio Grande do Norte (RN) | 217                    | (-425, 801)              | 103.2                                                        | (94.2, 113.1)                                                  |
| Sergipe (SE)             | -203                   | (-799, 105)              | 95.6                                                         | (84.6, 108.6)                                                  |
| <b>Southeast</b>         |                        |                          |                                                              |                                                                |
| Espírito Santo (ES)      | 752                    | (202, 1273)              | 111.9                                                        | (102.9, 122.0)                                                 |
| Minas Gerais (MG)        | 1327                   | (299, 2282)              | 106.5                                                        | (101.4, 111.7)                                                 |
| Rio de Janeiro (RJ)      | 9331                   | (7591, 11028)            | 114.8                                                        | (111.7, 118.0)                                                 |
| São Paulo (SP)           | 3042                   | (630, 5367)              | 103.0                                                        | (100.6, 105.3)                                                 |
| <b>South</b>             |                        |                          |                                                              |                                                                |
| Paraná (PR)              | 835                    | (68, 1591)               | 106.7                                                        | (100.5, 113.7)                                                 |
| Rio Grande do Sul (RS)   | -1386                  | (-2831, -43)             | 96.0                                                         | (92.1, 99.9)                                                   |
| Santa Catarina (SC)      | -864                   | (-1722, -20)             | 93.1                                                         | (87.1, 99.8)                                                   |
| <b>Midwest</b>           |                        |                          |                                                              |                                                                |
| Distrito Federal (DF)    | -562                   | (-1011, -166)            | 78.6                                                         | (67.1, 92.6)                                                   |
| Goiás (GO)               | 256                    | (-339, 804)              | 104.4                                                        | (94.8, 115.1)                                                  |
| Mato Grosso do Sul (MS)  | 474                    | (-124, 1021)             | 108.0                                                        | (98.1, 119.0)                                                  |
| Mato Grosso (MT)         | -5236                  | (-6296, 4217)            | 59.2                                                         | (54.7, 64.3)                                                   |

|              |       |                |       |                |
|--------------|-------|----------------|-------|----------------|
| <b>Total</b> | 22869 | (18126, 27528) | 105.2 | (104.1, 106.3) |
|--------------|-------|----------------|-------|----------------|

Table S3. Linear models of association of ratio of recorded to predicted cases with extreme poverty rate.

| <b>Coefficients</b>                                                                                                                  | <b>Estimates</b> | <b>Std.Error</b> | <b>Pr(&gt; t )</b> |
|--------------------------------------------------------------------------------------------------------------------------------------|------------------|------------------|--------------------|
| <b><i>Model</i></b>                                                                                                                  |                  |                  |                    |
| Intercept†                                                                                                                           | 0.999            | 0.049            | <0.0001            |
| Absolute increase in the average extreme poverty rate (<US \$1.9 using 2011 purchasing power parity) from pre-recession to recession | 0.044            | 0.024            | 0.078              |

† The intercept represents the value of outcome (ratio of observed to predicted TB cases) when the explanatory variable is equal to zero.

## FIGURES

Figure S1a. Pre-recession trends of rates of TB case notifications, absolute and excess cases in men by age group in Brazil over 2010 to 2019.

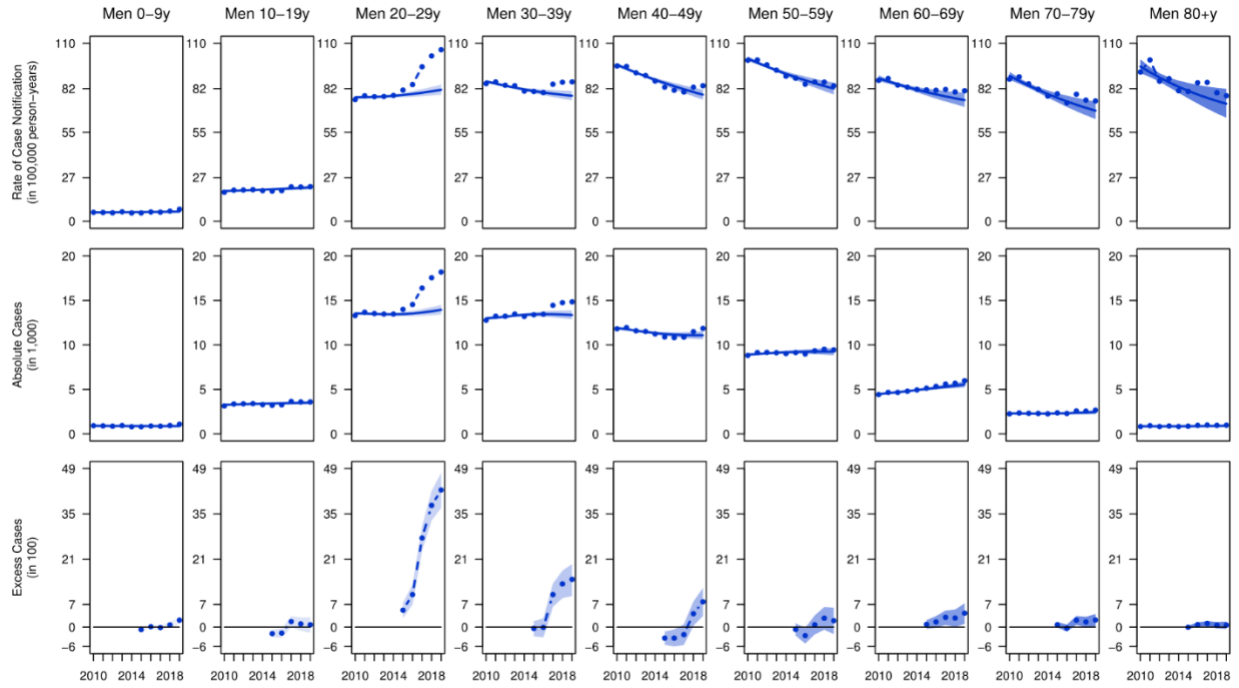

Figure S1b. Pre-recession trends of rates of TB case notifications, absolute and excess cases in women by age group in Brazil over 2010 to 2019.

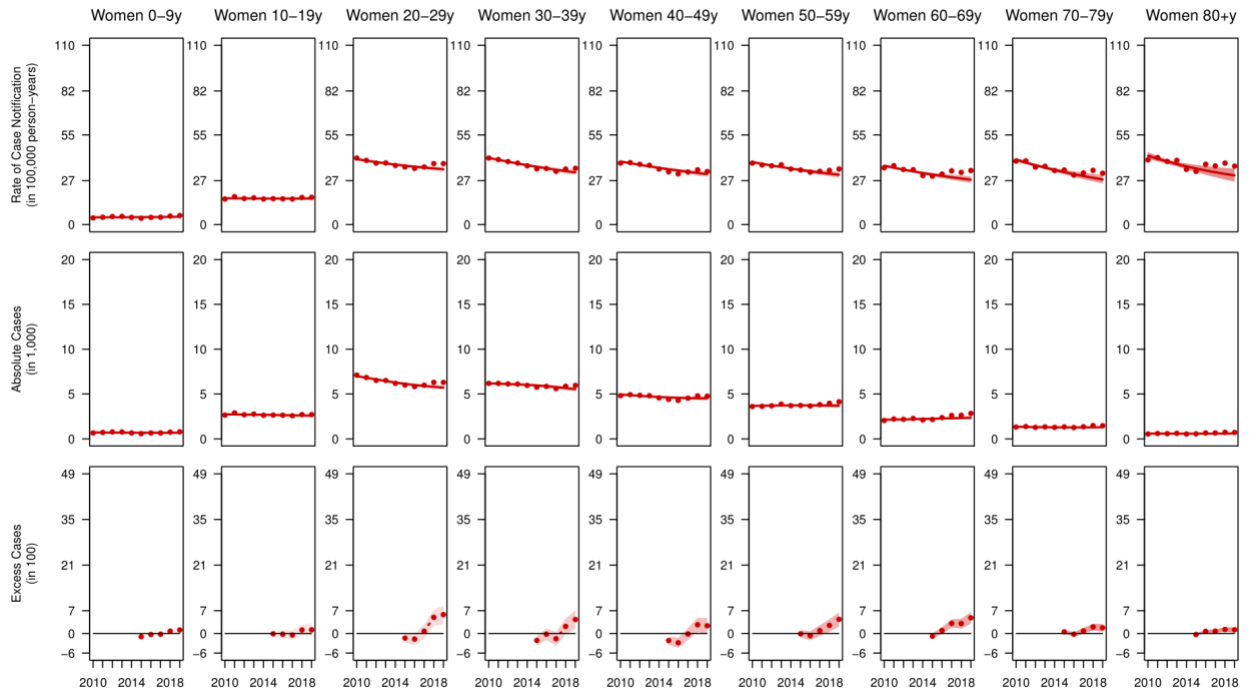

Figure S2. Pre-recession trends of rates of TB case notifications, absolute and excess cases by *state* in Brazil over 2010 to 2019.

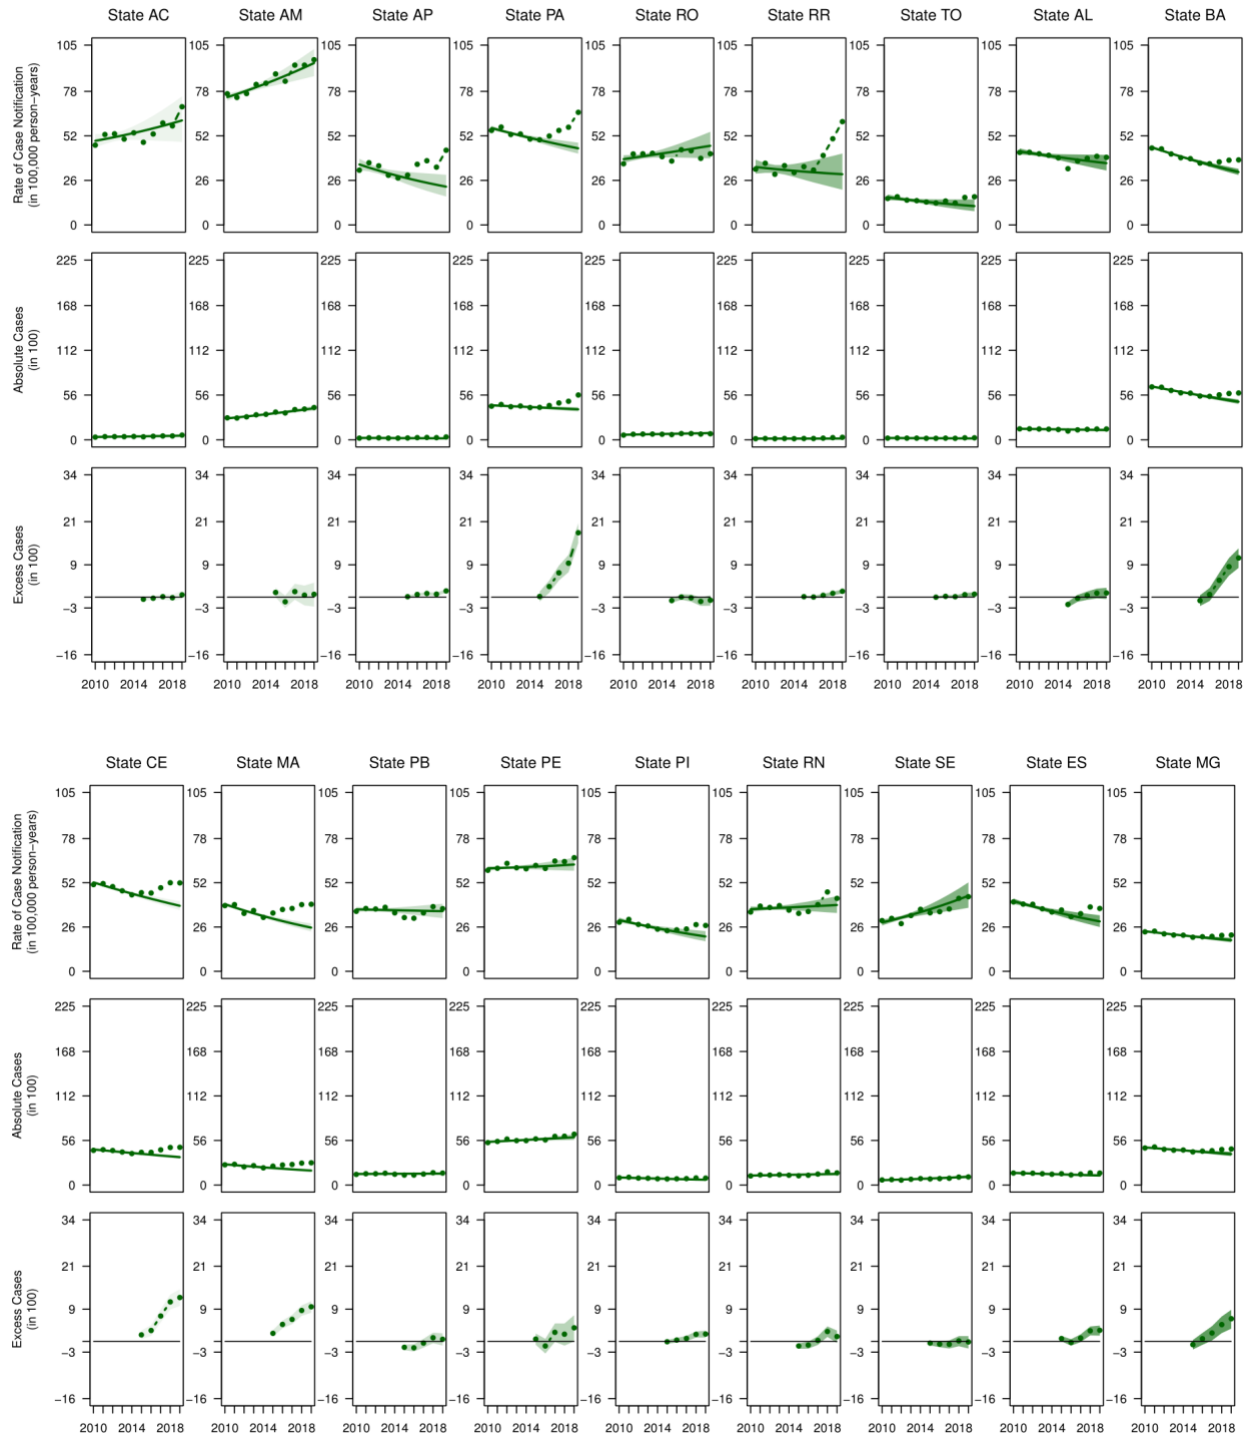



Figure S2 (Continued). Pre-recession trends of rates of TB case notifications, absolute and excess cases by *state* in Brazil over 2010 to 2019.

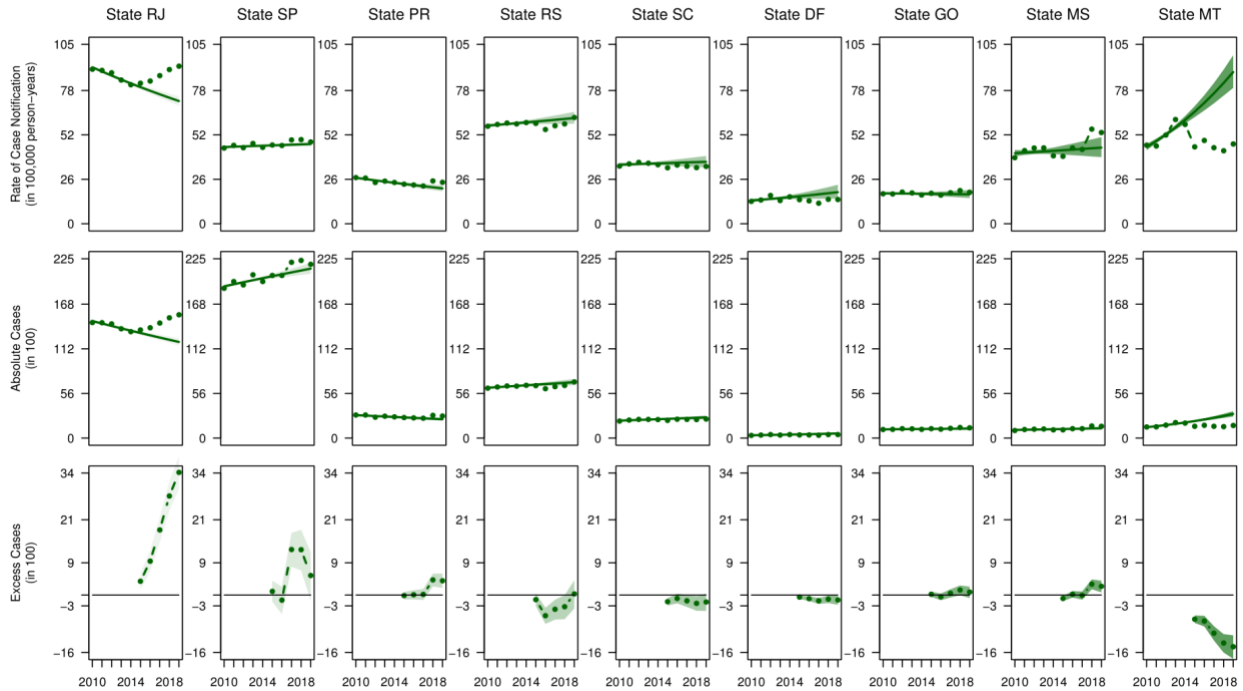

State Abbreviations:

North: AC- Acre, AM-Amazonas, AP-Amapá, PA-Pará, RO- Rondônia, RR-Roraima, TO-Tocantins

Northeast: AL-Alagoas, BA-Bahia, CE-Ceará, MA-Maranhão, PB-Paraíba, PE-Pernambuco, PI-Piauí, RN-Rio Grande do Norte, SE-Sergipe

Southeast: ES-Espírito Santo, MG-Minas Gerais, RJ-Rio de Janeiro, SP-São Paulo

South: PR-Paraná, RS-Rio Grande do Sul, SC-Santa Catarina,

Midwest: DF-Distrito Federal, GO-Goiás, MS-Mato Grosso do Sul, MT-Mato Grosso.

Figure S3a. Pre-recession trends of rates of TB deaths, absolute and excess deaths in *men* by age group in Brazil over 2010 to 2019.

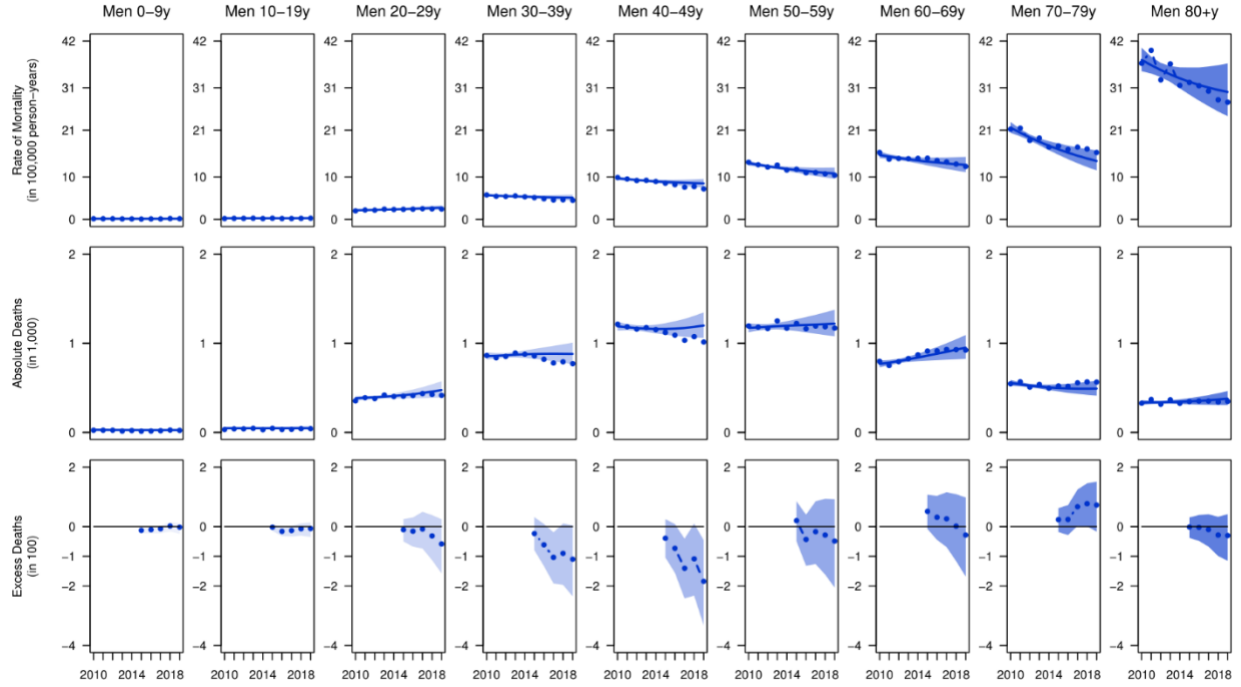

Figure S3b. Pre-recession trends of rates of TB deaths, absolute and excess deaths in *women* by age group in Brazil over 2010 to 2019.

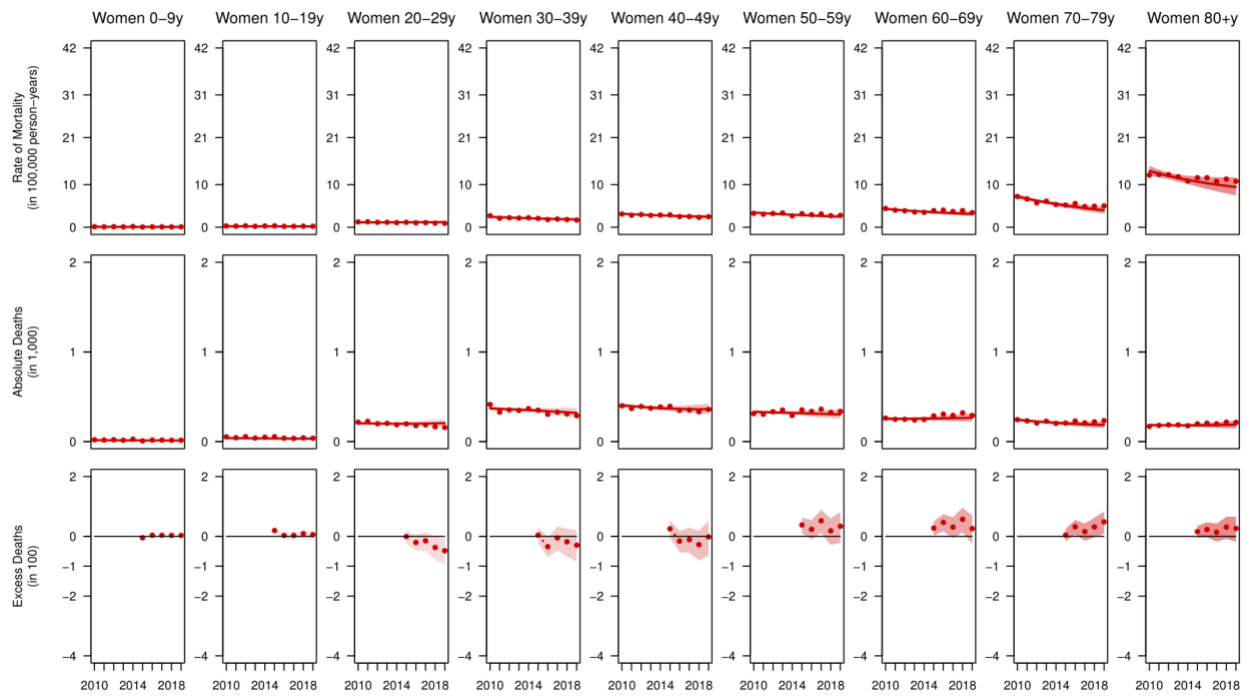

Figure S4. Pre-recession trends of rates of TB deaths, absolute and excess deaths by *state* in Brazil over 2010 to 2019.

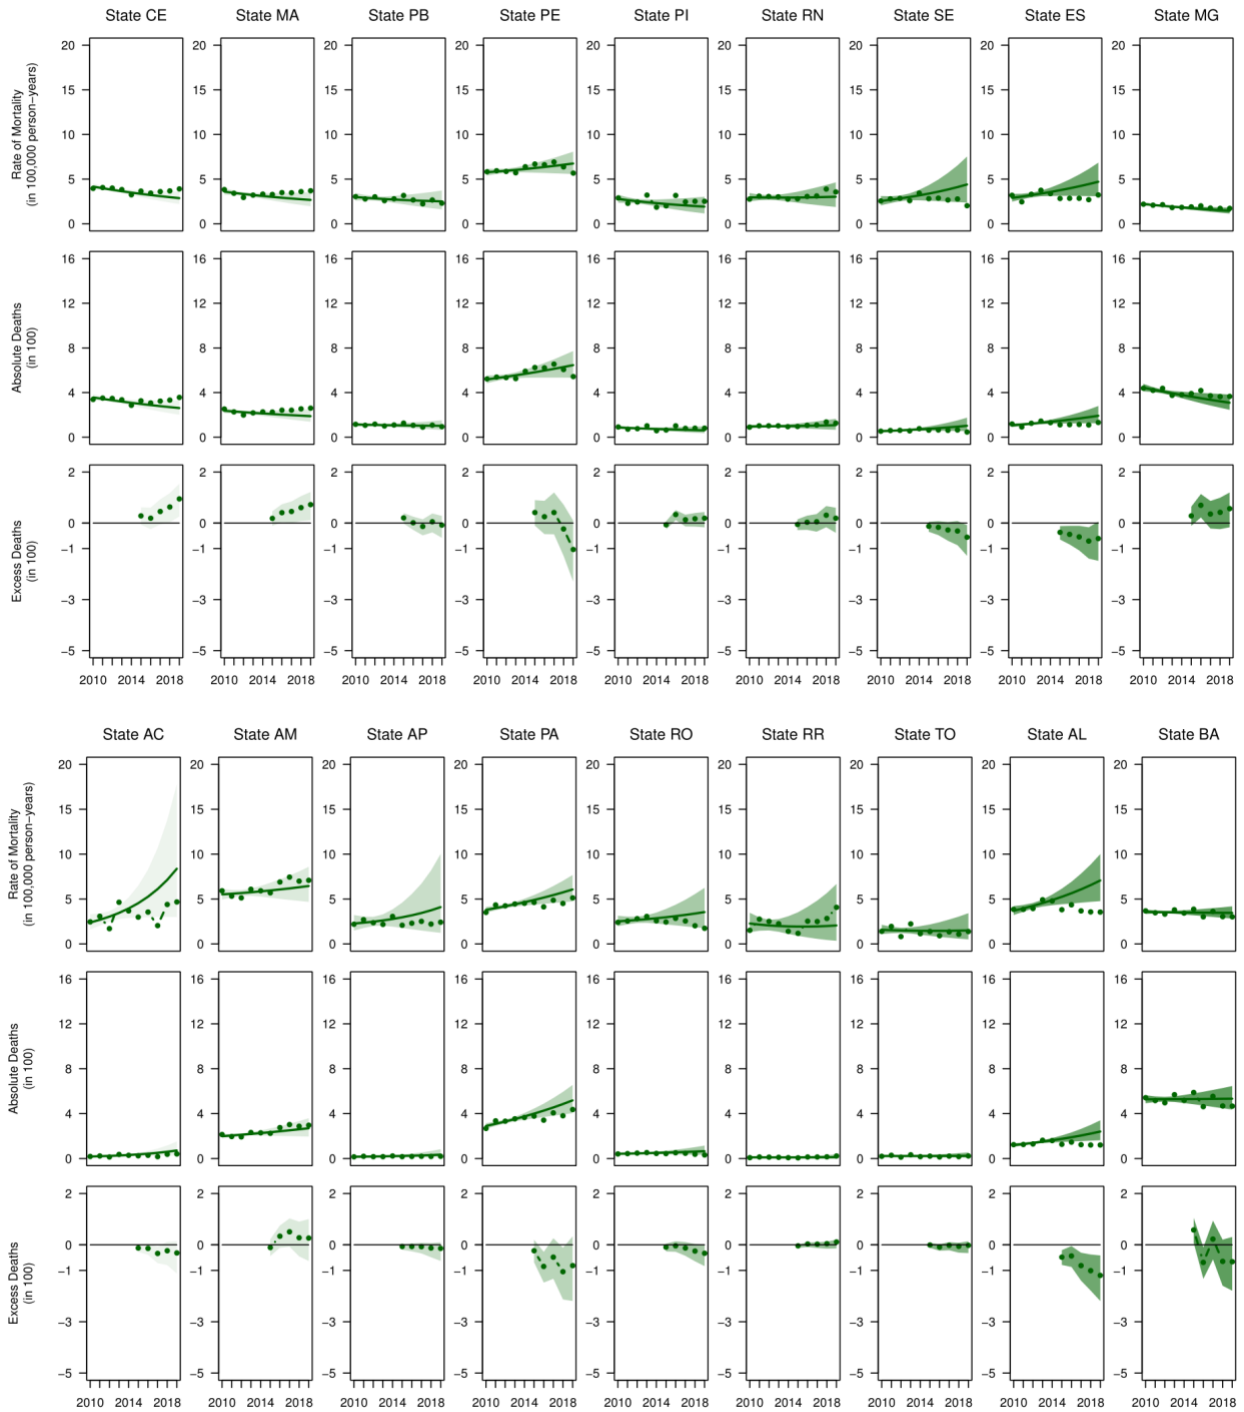

Figure S4 (Continued). Pre-recession trends of rates of TB deaths, absolute and excess deaths by *state* in Brazil over 2010 to 2019.

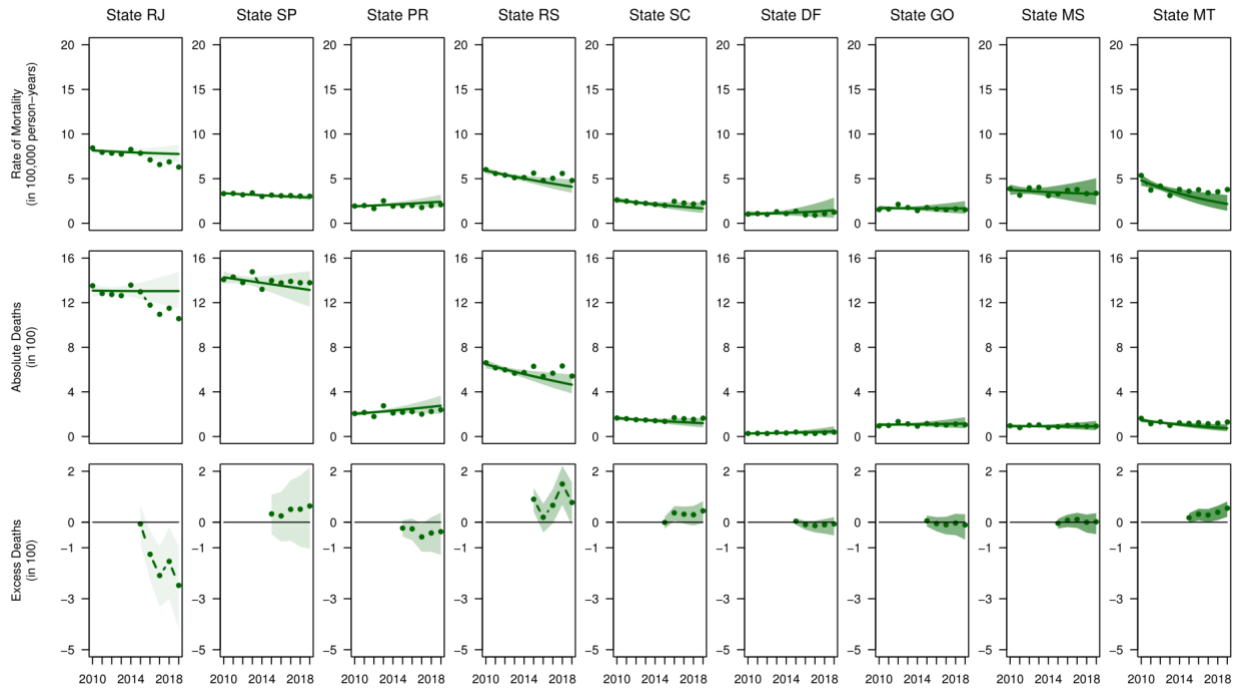

State Abbreviations:

North: AC- Acre, AM-Amazonas, AP-Amapá, PA-Pará, RO- Rondônia, RR-Roraima, TO-Tocantins

Northeast: AL-Alagoas, BA-Bahia, CE-Ceará, MA-Maranhão, PB-Paraíba, PE-Pernambuco, PI-Piauí, RN-Rio Grande do Norte, SE-Sergipe

Southeast: ES-Espírito Santo, MG-Minas Gerais, RJ-Rio de Janeiro, SP-São Paulo

South: PR-Paraná, RS-Rio Grande do Sul, SC-Santa Catarina,

Midwest: DF-Distrito Federal, GO-Goiás, MS-Mato Grosso do Sul, MT-Mato Grosso.

Figure S5a. Sensitivity analysis (1) results: Estimates of total excess cases and total excess deaths among total population and men ages 20–29 years during recession over 2015–2019, with different lengths of pre-recession periods (from 3 years of 2012–2014 to 14 years of 2001–2014).

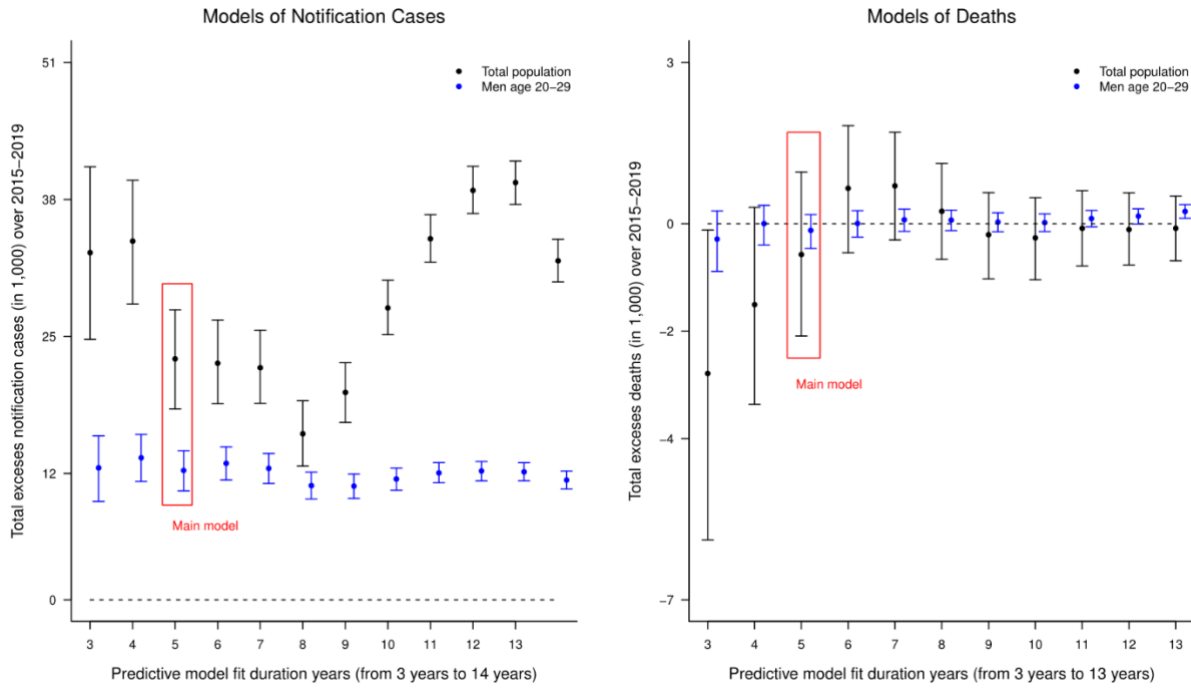

Figure S5b. Sensitivity analysis (2) results: Estimates of total excess deaths with alternative criteria for defining TB deaths among total population over 2010 to 2019.

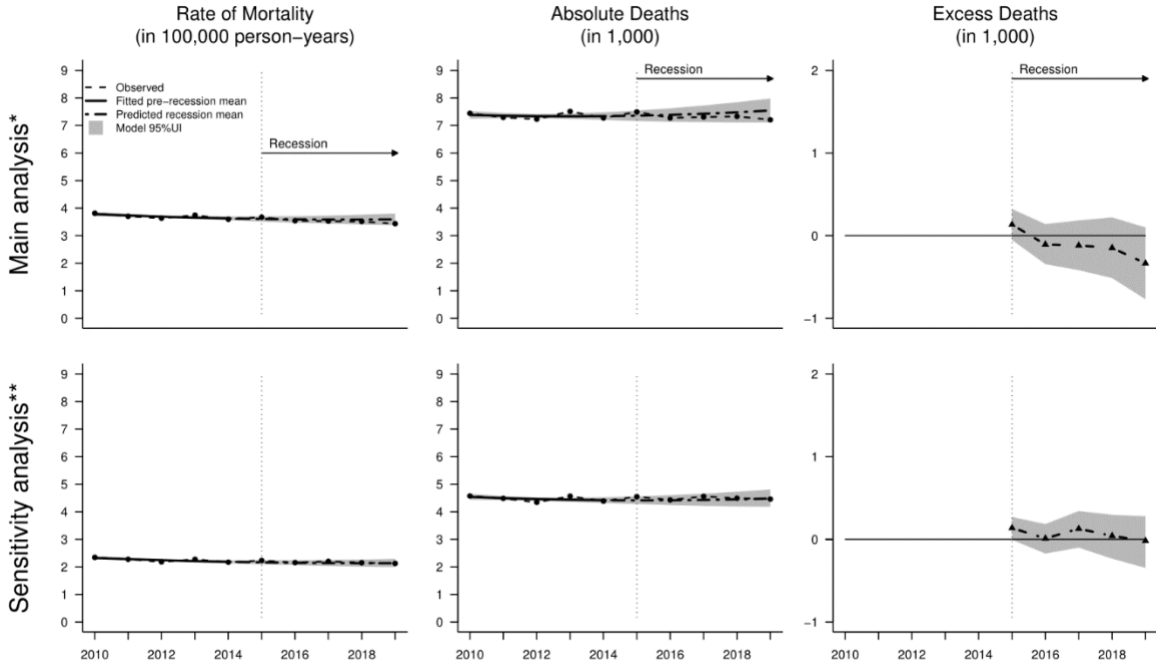

\*For the main analysis, TB deaths were defined as a death with ICD-10 codes A15.0-A19.9, K67.3, K93.0, M49.0, N74.0-N74.1, P37.0, or B20.0 listed as a primary or secondary cause.

\*\*In sensitivity analyses we recalculated results with a restrictive definition of TB death (deaths with A15.0-A19.9 listed as primary cause).
